# Supplementary material for: Nursing home staff networks and COVID-19
Source: PubMed Central journal article supplement — Proc Natl Acad Sci U S A. 2020 Dec 28;118(1):e2015455118. doi: 10.1073/pnas.2015455118 (PMC7817179; doi:10.1073/pnas.2015455118), 2020-12-28

1

2 **Supplementary Information for**  
3 **Nursing home staff networks and COVID-19**

4 **M. Keith Chen, Judith A. Chevalier, Elisa F. Long**

5 **Corresponding Author: M. Keith Chen**

6 **E-mail: [keith.chen@anderson.ucla.edu](mailto:keith.chen@anderson.ucla.edu)**

7 **This PDF file includes:**

8     Supplementary text

9     Fig. S1

10    Tables S1 to S6

## 11 **Supporting Information Text**

12 In this Supplement, we provide tables with network summary statistics by state, as well as full results from  
13 our main regression specification and three robustness checks. In Table S1, we report mean values and  
14 standard deviations of our four network measures, for all 48 contiguous states and the District of Columbia.

15 Next, we show all coefficient estimates for our main analysis in Table S2. Table S3 shows results for our  
16 main network measures, *Degree* and *Strength*, by individual state, for the 22 states with detailed COVID-19  
17 case counts prior to the mandated reporting by CMS in late-May.

18 In Table S4, we repeat our main analysis replacing the inverse hyperbolic sine of the number of cases  
19 in the nursing home with a binary variable that equals 1 if the nursing home has reported COVID cases  
20 among its residents. Here, for example, the results in column (1) suggest that, when 10 additional nursing  
21 home connections are added, the probability that a home has cases increases by 6.6 percentage points. In  
22 the overall data, 42 percent of homes have cases. The network measures are all statistically significant in  
23 this alternative specification. In Table S5 we repeat our main analysis replacing the state fixed effects with  
24 county fixed effects. This allows a smaller number of units within which variation can be measured. The  
25 urban variable, which is measured at the county-level, is omitted. Results are qualitatively similar to our  
26 state fixed effects data though, as expected, significance levels diminish somewhat.

27 As a final robustness check, we repeat our main analysis in Table S6 using data from CMS rather than  
28 data from the individual states. This allows us to examine the 48 continental United States plus the District  
29 of Columbia, but these data are subject to the reporting limitation that homes were not required to add  
30 cases prior to May into their cumulative case totals. The CMS data reports cases in 48 percent of nursing  
31 homes by week-ending May 31, 2020 but reports overall fewer cases than the individual state data. This  
32 is expected since the CMS data did not require homes to report cases in the cumulative total that had  
33 resolved before May 2020. In this robustness specification, point estimates for the network variables are  
34 slightly smaller than in our base specifications but qualitatively extremely similar.

**Table S1. State-level network summary statistics, mean and standard deviation**

| State | Resident COVID Cases per Nursing Home |      |      |      | Degree |      | Strength |      | Weighted Avg. Neighbor Degree |      | Eigenvector Centrality |  |
|-------|---------------------------------------|------|------|------|--------|------|----------|------|-------------------------------|------|------------------------|--|
|       | Mean                                  | SD   | Mean | SD   | Mean   | SD   | Mean     | SD   | Mean                          | SD   |                        |  |
|       | AL                                    | 10.0 | 19.9 | 5.8  | 4.8    | 8.3  | 8.5      | 7.9  | 4.1                           | 0.15 | 0.21                   |  |
| AR    | 4.5                                   | 16.1 | 3.4  | 3.2  | 4.5    | 5.0  | 4.6      | 3.3  | 0.09                          | 0.18 |                        |  |
| AZ    | 6.1                                   | 14.2 | 4.9  | 5.0  | 6.4    | 7.6  | 7.1      | 5.2  | 0.14                          | 0.21 |                        |  |
| CA    | 11.0                                  | 26.3 | 6.0  | 8.2  | 7.3    | 13.0 | 9.5      | 8.5  | 0.04                          | 0.13 |                        |  |
| CO    | 8.0                                   | 16.9 | 3.8  | 4.4  | 4.5    | 5.2  | 5.5      | 4.7  | 0.11                          | 0.18 |                        |  |
| CT    | 36.5                                  | 54.6 | 6.6  | 6.7  | 7.3    | 7.6  | 9.6      | 6.0  | 0.13                          | 0.21 |                        |  |
| DC    | 26.8                                  | 39.7 | 6.3  | 2.4  | 9.6    | 4.7  | 7.4      | 0.9  | 0.65                          | 0.23 |                        |  |
| DE    | 23.8                                  | 37.8 | 3.0  | 2.5  | 3.5    | 3.4  | 4.4      | 2.6  | 0.27                          | 0.26 |                        |  |
| FL    | 5.6                                   | 15.4 | 11.4 | 8.9  | 14.4   | 12.1 | 15.4     | 6.7  | 0.09                          | 0.15 |                        |  |
| GA    | 17.9                                  | 42.5 | 8.6  | 8.6  | 12.4   | 17.7 | 11.7     | 8.0  | 0.10                          | 0.18 |                        |  |
| IA    | 4.1                                   | 11.2 | 3.7  | 3.6  | 4.6    | 5.2  | 5.4      | 3.8  | 0.10                          | 0.19 |                        |  |
| ID    | 4.6                                   | 30.7 | 1.5  | 1.7  | 2.0    | 2.3  | 2.0      | 1.9  | 0.15                          | 0.26 |                        |  |
| IL    | 15.8                                  | 32.5 | 9.3  | 11.6 | 10.6   | 13.6 | 13.9     | 11.6 | 0.07                          | 0.18 |                        |  |
| IN    | 6.8                                   | 20.5 | 7.4  | 8.2  | 9.2    | 11.5 | 11.4     | 8.0  | 0.08                          | 0.15 |                        |  |
| KS    | 1.8                                   | 7.1  | 5.3  | 5.9  | 6.6    | 7.9  | 7.8      | 5.9  | 0.08                          | 0.19 |                        |  |
| KY    | 5.2                                   | 17.2 | 5.1  | 5.3  | 7.2    | 11.6 | 7.4      | 5.4  | 0.13                          | 0.20 |                        |  |
| LA    | 13.8                                  | 24.1 | 5.7  | 5.6  | 7.3    | 7.4  | 7.8      | 5.1  | 0.10                          | 0.23 |                        |  |
| MA    | 33.4                                  | 48.2 | 6.5  | 6.4  | 7.2    | 7.4  | 9.8      | 5.9  | 0.10                          | 0.18 |                        |  |
| MD    | 20.3                                  | 36.2 | 12.9 | 13.6 | 15.3   | 17.5 | 19.3     | 11.4 | 0.19                          | 0.28 |                        |  |
| ME    | 3.7                                   | 12.1 | 1.3  | 1.7  | 1.6    | 2.3  | 1.6      | 1.9  | 0.09                          | 0.24 |                        |  |
| MI    | 11.9                                  | 24.5 | 4.5  | 4.7  | 5.4    | 6.0  | 6.2      | 4.7  | 0.05                          | 0.17 |                        |  |
| MN    | 6.6                                   | 16.5 | 3.6  | 4.2  | 4.2    | 5.1  | 5.6      | 5.2  | 0.09                          | 0.18 |                        |  |
| MO    | 4.7                                   | 16.8 | 6.0  | 7.0  | 7.7    | 10.5 | 9.0      | 7.0  | 0.07                          | 0.16 |                        |  |
| MS    | 7.9                                   | 19.6 | 4.1  | 4.2  | 5.5    | 6.5  | 6.2      | 4.3  | 0.10                          | 0.24 |                        |  |
| MT    | 1.1                                   | 4.5  | 1.5  | 2.0  | 1.9    | 2.7  | 1.9      | 2.2  | 0.13                          | 0.24 |                        |  |
| NC    | 7.0                                   | 20.4 | 6.8  | 6.7  | 8.6    | 11.0 | 9.7      | 5.9  | 0.08                          | 0.18 |                        |  |
| ND    | 3.3                                   | 8.2  | 1.9  | 3.1  | 3.6    | 7.1  | 6.7      | 8.1  | 0.11                          | 0.15 |                        |  |
| NE    | 4.1                                   | 13.2 | 2.4  | 2.5  | 2.7    | 3.0  | 3.4      | 2.7  | 0.10                          | 0.17 |                        |  |
| NH    | 17.4                                  | 46.7 | 2.8  | 3.2  | 3.1    | 3.9  | 4.1      | 3.6  | 0.15                          | 0.31 |                        |  |
| NJ    | 33.9                                  | 49.8 | 10.4 | 8.2  | 12.6   | 11.0 | 15.0     | 6.0  | 0.23                          | 0.20 |                        |  |
| NM    | 3.2                                   | 11.7 | 3.8  | 4.1  | 5.4    | 7.8  | 5.0      | 4.3  | 0.17                          | 0.23 |                        |  |
| NV    | 17.7                                  | 34.9 | 3.3  | 3.1  | 4.0    | 4.4  | 4.2      | 3.1  | 0.29                          | 0.35 |                        |  |
| NY    | 24.3                                  | 46.3 | 7.8  | 9.4  | 10.6   | 14.7 | 12.6     | 9.6  | 0.07                          | 0.20 |                        |  |
| OH    | 5.6                                   | 15.9 | 8.8  | 8.0  | 10.9   | 11.3 | 13.3     | 7.6  | 0.05                          | 0.10 |                        |  |
| OK    | 2.2                                   | 8.2  | 5.6  | 6.5  | 6.9    | 8.6  | 7.8      | 6.4  | 0.09                          | 0.19 |                        |  |
| OR    | 2.8                                   | 7.2  | 3.0  | 3.4  | 3.4    | 3.9  | 4.2      | 3.6  | 0.10                          | 0.21 |                        |  |
| PA    | 19.1                                  | 39.2 | 7.2  | 7.9  | 9.8    | 15.6 | 10.6     | 7.8  | 0.07                          | 0.16 |                        |  |
| RI    | 22.5                                  | 38.8 | 4.6  | 3.8  | 5.0    | 4.4  | 6.7      | 3.5  | 0.23                          | 0.23 |                        |  |
| SC    | 9.7                                   | 23.7 | 5.1  | 4.4  | 7.1    | 6.8  | 6.7      | 4.0  | 0.10                          | 0.20 |                        |  |
| SD    | 2.1                                   | 6.2  | 1.0  | 1.2  | 1.2    | 1.8  | 1.4      | 1.6  | 0.05                          | 0.18 |                        |  |
| TN    | 2.9                                   | 8.4  | 5.7  | 4.9  | 7.9    | 8.1  | 8.6      | 4.7  | 0.11                          | 0.17 |                        |  |
| TX    | 3.8                                   | 18.8 | 9.2  | 10.4 | 13.4   | 50.2 | 14.3     | 10.6 | 0.04                          | 0.12 |                        |  |
| UT    | 4.4                                   | 25.8 | 2.8  | 3.3  | 3.8    | 5.0  | 4.2      | 3.6  | 0.13                          | 0.22 |                        |  |
| VA    | 9.3                                   | 23.4 | 6.8  | 7.4  | 8.3    | 9.3  | 9.8      | 6.8  | 0.11                          | 0.22 |                        |  |
| VT    | 9.2                                   | 19.9 | 0.5  | 1.1  | 0.6    | 1.3  | 0.6      | 1.2  | 0.12                          | 0.31 |                        |  |
| WA    | 6.3                                   | 18.6 | 4.3  | 5.8  | 4.7    | 6.4  | 6.0      | 6.0  | 0.11                          | 0.27 |                        |  |
| WI    | 4.0                                   | 10.9 | 3.2  | 4.4  | 4.1    | 6.8  | 4.8      | 5.1  | 0.06                          | 0.19 |                        |  |
| WV    | 3.3                                   | 10.8 | 3.6  | 3.7  | 5.3    | 8.0  | 5.8      | 4.5  | 0.14                          | 0.24 |                        |  |
| WY    | 1.1                                   | 3.1  | 0.5  | 0.9  | 0.8    | 1.8  | 0.5      | 1.0  | 0.11                          | 0.29 |                        |  |

COVID-19 cases include confirmed and suspected cases among residents reported to CMS as of May 31, 2020. *Degree* is the number of nursing homes that a particular home is connected to through a smartphone observed in both facilities. *Strength* is the total number of smartphones observed in a nursing home and other connected homes. *Weighted average neighbor degree* is the average number of connections a nursing home’s neighbor has, weighted by the pair strength. *Eigenvector centrality* measures the extent to which a nursing home’s neighbors are highly connected, and is calculated within each state and ranges from 0 to 1. Additional details are available in the Materials and Methods section.

**Table S2. Detailed covariates of COVID case count specifications**

|                                           | Dependent variable: $\sinh^{-1}(\text{Cases})$ |                               |                               |                               |                               |
|-------------------------------------------|------------------------------------------------|-------------------------------|-------------------------------|-------------------------------|-------------------------------|
|                                           | (1)                                            | (2)                           | (3)                           | (4)                           | (5)                           |
| <i>Beds</i>                               | 0.00957***<br>(0.000744)                       | 0.0103***<br>(0.000744)       | 0.00981***<br>(0.000737)      | 0.00936***<br>(0.000740)      | 0.0103***<br>(0.000744)       |
| <i>Beds</i> <sup>2</sup>                  | -0.00000554**<br>(0.00000171)                  | -0.00000635**<br>(0.00000172) | -0.00000533**<br>(0.00000170) | -0.00000501**<br>(0.00000170) | -0.00000621**<br>(0.00000172) |
| <i>High proportion on Medicaid</i>        | 0.0891<br>(0.0456)                             | 0.0925+<br>(0.0459)           | 0.0783<br>(0.0428)            | 0.0797<br>(0.0453)            | 0.0936<br>(0.0459)            |
| <i>High proportion of Black residents</i> | 0.526***<br>(0.0588)                           | 0.547***<br>(0.0591)          | 0.491***<br>(0.0587)          | 0.489***<br>(0.0586)          | 0.563***<br>(0.0591)          |
| <i>CMS rating 1</i>                       | -0.0656<br>(0.0701)                            | -0.0615<br>(0.0706)           | -0.0685<br>(0.0698)           | -0.0689<br>(0.0697)           | -0.0650<br>(0.0706)           |
| <i>CMS rating 2</i>                       | -0.0032<br>(0.0633)                            | 0.00262<br>(0.0637)           | -0.00924<br>(0.0630)          | -0.0101<br>(0.0629)           | -0.00423<br>(0.0637)          |
| <i>CMS rating 3</i>                       | 0.0593<br>(0.0634)                             | 0.0681<br>(0.0638)            | 0.0592<br>(0.0631)            | 0.0558<br>(0.0630)            | 0.0609<br>(0.0638)            |
| <i>CMS rating 4</i>                       | -0.0204<br>(0.0585)                            | -0.0141<br>(0.0589)           | -0.0193<br>(0.0583)           | -0.0216<br>(0.0582)           | -0.0215<br>(0.0589)           |
| <i>Has infection Violations</i>           | -0.0750<br>(0.0505)                            | -0.0691<br>(0.0508)           | -0.0677<br>(0.0503)           | -0.0725<br>(0.0502)           | -0.0783<br>(0.0508)           |
| <i>Urban indicator</i>                    | 0.734***<br>(0.0563)                           | 0.782***<br>(0.0564)          | 0.662***<br>(0.0568)          | 0.656***<br>(0.0566)          | 0.770***<br>(0.0566)          |
| <i>For profit indicator</i>               | 0.224***<br>(0.0495)                           | 0.249***<br>(0.0497)          | 0.207***<br>(0.0493)          | 0.200***<br>(0.0492)          | 0.234***<br>(0.0498)          |
| <i>Node degree</i>                        | 0.0343***<br>(0.00255)                         |                               |                               | 0.0242***<br>(0.00508)        |                               |
| <i>Node strength</i>                      |                                                | 0.0163***<br>(0.00166)        |                               | -0.00610+<br>(0.00297)        |                               |
| <i>Weighted average neighbor degree</i>   |                                                |                               | 0.0409***<br>(0.00267)        | 0.0299***<br>(0.00344)        |                               |
| <i>Eigenvector centrality in state</i>    |                                                |                               |                               |                               | 1.044***<br>(0.109)           |
| <i>Fixed effects</i>                      | State                                          | State                         | State                         | State                         | State                         |
| <i>Observations</i>                       | 6,337                                          | 6,337                         | 6,337                         | 6,337                         | 6,337                         |
| <i>F-stat</i>                             | 123.4                                          | 114.9                         | 128.7                         | 112.9                         | 114.5                         |
| <i>R<sup>2</sup></i>                      | 0.408                                          | 0.400                         | 0.412                         | 0.415                         | 0.399                         |
| <i>Within R<sup>2</sup></i>               | 0.189                                          | 0.178                         | 0.195                         | 0.199                         | 0.177                         |

Standard errors in parentheses. Significance levels: + $p < 0.05$ , \* $p < 0.01$ , \*\* $p < 0.001$ , \*\*\* $p < 0.0001$ . Dependent variable is the inverse hyperbolic sine of COVID cases in a nursing home.

**Table S3. Covariates of COVID-19 cases within nursing homes, by individual state**

| Dependent variable: $\sinh^{-1}(\text{Cases})$ |  |                        |                       |                     |                     |                    |                    |                   |                   |                     |                      |
|------------------------------------------------|--|------------------------|-----------------------|---------------------|---------------------|--------------------|--------------------|-------------------|-------------------|---------------------|----------------------|
|                                                |  | CA                     |                       | CT                  |                     | CO                 |                    | DC                |                   | FL                  |                      |
|                                                |  | (1)                    | (2)                   | (1)                 | (2)                 | (1)                | (2)                | (1)               | (2)               | (1)                 | (2)                  |
| <i>Node degree</i>                             |  | 0.0262***<br>(0.00620) |                       | 0.0409+<br>(0.0193) |                     | 0.0188<br>(0.0320) |                    | 0.0872<br>(0.227) |                   | 0.0123<br>(0.00545) |                      |
| <i>Node strength</i>                           |  |                        | 0.0141**<br>(0.00381) |                     | 0.0362+<br>(0.0172) |                    | 0.0207<br>(0.0263) |                   | 0.0190<br>(0.122) |                     | 0.00573<br>(0.00402) |
| <i>Observations</i>                            |  | 1034                   | 1034                  | 199                 | 199                 | 178                | 178                | 17                | 17                | 575                 | 575                  |
| <i>F-stat</i>                                  |  | 12.66                  | 12.27                 | 6.905               | 6.898               | 3.489              | 3.518              | 1.898             | 1.847             | 3.83                | 3.561                |
| <i>R<sup>2</sup></i>                           |  | 0.130                  | 0.126                 | 0.308               | 0.308               | 0.202              | 0.204              | 0.760             | 0.755             | 0.076               | 0.0707               |

  

| Dependent variable: $\sinh^{-1}(\text{Cases})$ |  |                       |                      |                        |                        |                   |                      |                    |                     |                       |                        |
|------------------------------------------------|--|-----------------------|----------------------|------------------------|------------------------|-------------------|----------------------|--------------------|---------------------|-----------------------|------------------------|
|                                                |  | GA                    |                      | IL                     |                        | KY                |                      | LA                 |                     | MA                    |                        |
|                                                |  | (1)                   | (2)                  | (1)                    | (2)                    | (1)               | (2)                  | (1)                | (2)                 | (1)                   | (2)                    |
| <i>Node degree</i>                             |  | 0.0474***<br>(0.0120) |                      | 0.0269***<br>(0.00592) |                        | 0.031<br>(0.0168) |                      | 0.0146<br>(0.0202) |                     | 0.0480***<br>(0.0113) |                        |
| <i>Node strength</i>                           |  |                       | 0.0125+<br>(0.00576) |                        | 0.0219***<br>(0.00509) |                   | 0.00340<br>(0.00782) |                    | 0.00950<br>(0.0155) |                       | 0.0403***<br>(0.00986) |
| <i>Observations</i>                            |  | 338                   | 338                  | 637                    | 637                    | 256               | 256                  | 202                | 202                 | 363                   | 363                    |
| <i>F-stat</i>                                  |  | 6.395                 | 5.315                | 49.02                  | 48.69                  | 2.647             | 2.349                | 1.682              | 1.668               | 8.234                 | 8.114                  |
| <i>R<sup>2</sup></i>                           |  | 0.191                 | 0.164                | 0.485                  | 0.484                  | 0.116             | 0.104                | 0.097              | 0.0958              | 0.220                 | 0.218                  |

  

| Dependent variable: $\sinh^{-1}(\text{Cases})$ |  |                      |                      |                    |                    |                      |                      |                    |                       |                    |                      |
|------------------------------------------------|--|----------------------|----------------------|--------------------|--------------------|----------------------|----------------------|--------------------|-----------------------|--------------------|----------------------|
|                                                |  | MD                   |                      | MI                 |                    | MS                   |                      | NC                 |                       | ND                 |                      |
|                                                |  | (1)                  | (2)                  | (1)                | (2)                | (1)                  | (2)                  | (1)                | (2)                   | (1)                | (2)                  |
| <i>Node degree</i>                             |  | 0.0195+<br>(0.00833) |                      | 0.0325<br>(0.0208) |                    | -0.0539*<br>(0.0204) |                      | 0.0131<br>(0.0110) |                       | -0.026<br>(0.0438) |                      |
| <i>Node strength</i>                           |  |                      | 0.0140+<br>(0.00635) |                    | 0.0227<br>(0.0162) |                      | -0.0296+<br>(0.0136) |                    | 0.000479<br>(0.00680) |                    | -0.00984<br>(0.0196) |
| <i>Observations</i>                            |  | 150                  | 150                  | 367                | 367                | 141                  | 141                  | 401                | 401                   | 64                 | 64                   |
| <i>F-stat</i>                                  |  | 6.16                 | 6.082                | 12.2               | 12.15              | 1.454                | 1.253                | 1.994              | 1.871                 | 4.473              | 4.455                |
| <i>R<sup>2</sup></i>                           |  | 0.350                | 0.348                | 0.293              | 0.292              | 0.120                | 0.105                | 0.058              | 0.0547                | 0.486              | 0.485                |

  

| Dependent variable: $\sinh^{-1}(\text{Cases})$ |  |                    |                     |                     |                       |                        |                        |                     |                    |                    |                     |
|------------------------------------------------|--|--------------------|---------------------|---------------------|-----------------------|------------------------|------------------------|---------------------|--------------------|--------------------|---------------------|
|                                                |  | NH                 |                     | NJ                  |                       | PA                     |                        | RI                  |                    | SC                 |                     |
|                                                |  | (1)                | (2)                 | (1)                 | (2)                   | (1)                    | (2)                    | (1)                 | (2)                | (1)                | (2)                 |
| <i>Node degree</i>                             |  | 0.200*<br>(0.0605) |                     | 0.00629<br>(0.0102) |                       | 0.0778***<br>(0.00971) |                        | 0.264**<br>(0.0740) |                    | 0.0175<br>(0.0227) |                     |
| <i>Node strength</i>                           |  |                    | 0.180**<br>(0.0506) |                     | 0.000707<br>(0.00752) |                        | 0.0188***<br>(0.00472) |                     | 0.208*<br>(0.0646) |                    | 0.00129<br>(0.0143) |
| <i>Observations</i>                            |  | 66                 | 66                  | 332                 | 332                   | 645                    | 645                    | 74                  | 74                 | 155                | 155                 |
| <i>F-stat</i>                                  |  | 3.152              | 3.359               | 10.8                | 10.76                 | 25.86                  | 20.41                  | 4.108               | 3.775              | 0.68               | 0.629               |
| <i>R<sup>2</sup></i>                           |  | 0.391              | 0.406               | 0.271               | 0.270                 | 0.329                  | 0.279                  | 0.395               | 0.375              | 0.054              | 0.0505              |

  

| Dependent variable: $\sinh^{-1}(\text{Cases})$ |  |                     |                     |                    |                    |
|------------------------------------------------|--|---------------------|---------------------|--------------------|--------------------|
|                                                |  | TN                  |                     | WV                 |                    |
|                                                |  | (1)                 | (2)                 | (1)                | (2)                |
| <i>Node degree</i>                             |  | 0.00275<br>(0.0432) |                     | 0.0105<br>(0.0281) |                    |
| <i>Node strength</i>                           |  |                     | 0.00349<br>(0.0310) |                    | 0.0119<br>(0.0133) |
| <i>Observations</i>                            |  | 40                  | 40                  | 103                | 103                |
| <i>F-stat</i>                                  |  | 0.792               | 0.793               | 1.203              | 1.273              |
| <i>R<sup>2</sup></i>                           |  | 0.260               | 0.261               | 0.127              | 0.133              |

Standard errors in parentheses. Significance levels: + $p < 0.05$ , \* $p < 0.01$ , \*\* $p < 0.001$ , \*\*\* $p < 0.0001$ .

Dependent variable is inverse hyperbolic sine of COVID cases in the nursing home.

Demographics include number of beds, high proportion of Black residents, and high proportion on Medicaid.

CMS quality is a 1-5 categorical rating.

**Table S4. Covariates of the existence of nursing home COVID-19 cases**

|                                         | Dependent variable: Nursing home has > 0 cases |                          |                          |                          |                      |
|-----------------------------------------|------------------------------------------------|--------------------------|--------------------------|--------------------------|----------------------|
|                                         | (1)                                            | (2)                      | (3)                      | (4)                      | (5)                  |
| <i>Node degree</i>                      | 0.00703***<br>(0.000679)                       |                          |                          | 0.00410*<br>(0.0013)     |                      |
| <i>Node strength</i>                    |                                                | 0.00319***<br>(0.000442) |                          | -0.00167+<br>(0.000790)  |                      |
| <i>Weighted average neighbor degree</i> |                                                |                          | 0.00981***<br>(0.000710) | 0.00847***<br>(0.000915) |                      |
| <i>Eigenvector centrality in state</i>  |                                                |                          |                          |                          | 0.180***<br>(0.0289) |
| <i>Fixed effects</i>                    | State                                          | State                    | State                    | State                    | State                |
| <i>Home demographics</i>                | Yes                                            | Yes                      | Yes                      | Yes                      | Yes                  |
| <i>CMS quality rating</i>               | Yes                                            | Yes                      | Yes                      | Yes                      | Yes                  |
| <i>Observations</i>                     | 6,337                                          | 6,337                    | 6,337                    | 6,337                    | 6,337                |
| <i>F-stat</i>                           | 76.02                                          | 70.87                    | 83.88                    | 72.64                    | 69.60                |
| <i>R<sup>2</sup></i>                    | 0.326                                          | 0.3146                   | 0.335                    | 0.336                    | 0.319                |
| <i>Within R<sup>2</sup></i>             | 0.125                                          | 0.117                    | 0.136                    | 0.137                    | 0.115                |

Standard errors in parentheses. Significance levels: <sup>+</sup> $p < 0.05$ ,  $*p < 0.01$ ,  $**p < 0.001$ ,  $***p < 0.0001$ . Dependent variable is a binary indicator that equals 1 if COVID cases are reported in a nursing home. Demographics include number of beds, high proportion of Black residents, and high proportion on Medicaid. CMS quality is a 1-5 categorical rating.

**Table S5. Covariates of nursing home COVID-19 cases with county fixed effects**

|                                         | Dependent variable: $\sinh^{-1}(Cases)$ |                         |                        |                         |                     |
|-----------------------------------------|-----------------------------------------|-------------------------|------------------------|-------------------------|---------------------|
|                                         | (1)                                     | (2)                     | (3)                    | (4)                     | (5)                 |
| <i>Node degree</i>                      | 0.0193***<br>(0.00264)                  |                         |                        | 0.0217***<br>(0.005088) |                     |
| <i>Node strength</i>                    |                                         | 0.00937***<br>(0.00171) |                        | -0.00304<br>(0.003066)  |                     |
| <i>Weighted average neighbor degree</i> |                                         |                         | 0.0148***<br>(0.00313) | 0.00318<br>(0.00373)    |                     |
| <i>Eigenvector centrality in state</i>  |                                         |                         |                        |                         | 0.684***<br>(0.119) |
| <i>Fixed effects</i>                    | County                                  | County                  | County                 | County                  | County              |
| <i>Home demographics</i>                | Yes                                     | Yes                     | Yes                    | Yes                     | Yes                 |
| <i>CMS quality rating</i>               | Yes                                     | Yes                     | Yes                    | Yes                     | Yes                 |
| <i>Observations</i>                     | 5,967                                   | 5,967                   | 5,967                  | 5,967                   | 5,967               |
| <i>F-stat</i>                           | 61.78                                   | 59.40                   | 58.63                  | 52.41                   | 59.73               |
| <i>R<sup>2</sup></i>                    | 0.569                                   | 0.567                   | 0.566                  | 0.569                   | 0.567               |
| <i>Within R<sup>2</sup></i>             | 0.113                                   | 0.109                   | 0.108                  | 0.113                   | 0.110               |

Standard errors in parentheses. Significance levels: <sup>+</sup> $p < 0.05$ ,  $*p < 0.01$ ,  $**p < 0.001$ ,  $***p < 0.0001$ . Dependent variable is inverse hyperbolic sine of COVID cases in the nursing home using individual state data. Demographics include number of beds, high proportion of Black residents, and high proportion on Medicaid. CMS quality is a 1-5 categorical rating.

**Table S6. Covariates of COVID-19 cases within nursing homes using CMS data**

|                                         | Dependent variable: $\sinh^{-1}(\text{Cases})$ |                          |                        |                        |                      |
|-----------------------------------------|------------------------------------------------|--------------------------|------------------------|------------------------|----------------------|
|                                         | (1)                                            | (2)                      | (3)                    | (4)                    | (5)                  |
| <i>Node degree</i>                      | 0.0207***<br>(0.00187)                         |                          |                        | 0.0164***<br>(0.00300) |                      |
| <i>Node strength</i>                    |                                                | 0.00639***<br>(0.000964) |                        | -0.00219<br>(0.00135)  |                      |
| <i>Weighted average neighbor degree</i> |                                                |                          | 0.0204***<br>(0.00190) | 0.0120***<br>(0.00241) |                      |
| <i>Eigenvector centrality in state</i>  |                                                |                          |                        |                        | 0.623***<br>(0.0759) |
| <i>Fixed effects</i>                    | State                                          | State                    | State                  | State                  | State                |
| <i>Home demographics</i>                | Yes                                            | Yes                      | Yes                    | Yes                    | Yes                  |
| <i>CMS quality rating</i>               | Yes                                            | Yes                      | Yes                    | Yes                    | Yes                  |
| <i>Observations</i>                     | 13,165                                         | 13,165                   | 13,165                 | 13,165                 | 13,165               |
| <i>F-stat</i>                           | 157.3                                          | 149.8                    | 156.6                  | 137.0                  | 152.0                |
| <i>R<sup>2</sup></i>                    | 0.258                                          | 0.253                    | 0.257                  | 0.259                  | 0.254                |
| <i>Within R<sup>2</sup></i>             | 0.125                                          | 0.120                    | 0.125                  | 0.127                  | 0.121                |

Standard errors in parentheses. Significance levels:  $^+p < 0.05$ ,  $*p < 0.01$ ,  $**p < 0.001$ ,  $***p < 0.0001$ . Dependent variable is inverse hyperbolic sine of COVID cases in the nursing home using CMS data. Demographics include number of beds, high proportion of Black residents, and high proportion on Medicaid. CMS quality is a 1-5 categorical rating.

**Fig. S1.** Fraction of state nursing homes with a reported COVID-19 outbreak over time.

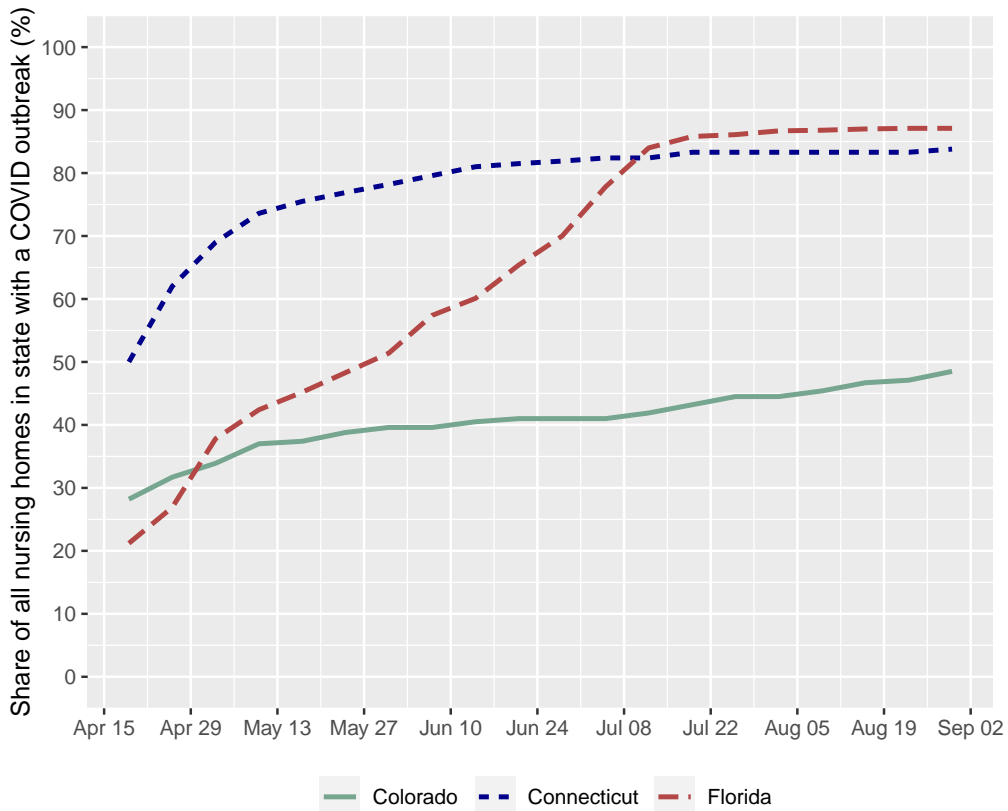

Supplement: pnas.2015455118.sapp.pdf [file pnas.2015455118.sapp.pdf]
